# Supplementary material for: Psychotherapeutische Versorgungslage: Aktuelle Daten
Source: Springer Nature journal article supplement (doi:10.1007/s00739-018-0468-0), 2018-04-19
Supplement: MOESM1 [file 15708264]

**Literatur**

1. American-Psychiatric-Association (2017) American Psychiatric Association Practice Guidelines. <http://psychiatryonline.org/guidelines>

2. Deck R, Hüppe A (2014) Nachsorge Neues Credo–Transfer in die Psychosomatik. 23. Rehabilitationswissenschaftliches Kolloquium:456

3. Dgppn (2017) Praxisleitlinien in Psychiatrie und Psychotherapie. <https://www.dgppn.de/leitlinien-publikationen/leitlinien.html>

4. Fittig E, Hickmann M, Kunze J (2016) Damit die Wirkung nicht verblasst–IRENA-Nachsorge nach psychosomatischer Rehabilitation. In: 25. Rehabilitationswissenschaftliches Kolloquium. p 131

5. Hauptverband-Der-Österreichischen-Sozialversicherungsträger, Salzburger-Gebietskrankenkasse (2011) Analyse der Versorgung psychisch Erkrankter. Projekt „Psychische Gesundheit “, Abschlussbericht. <http://www.hauptverband.at/cdscontent/load?contentid=10008.564640>

6. Holzner B, Giesinger JM, Pinggera J et al. (2012) The Computer-based Health Evaluation Software (CHES): a software for electronic patient-reported outcome monitoring. BMC medical informatics and decision making 12:126

7. Insel TR (2008) Assessing the Economic Costs of Serious Mental Illness. American Journal of Psychiatry 165:663-665

8. Lenz G (2013) Evaluationsergebnisse der medizinischen Rehabilitation bei psychischen Störungen. Spectrum Psychiatrie 3:20-23

9. Liebherz S, Rabung S (2013) Effectiveness of psychotherapeutic hospital treatment in German speaking countries: a meta-analysis. Psychother Psychosom Med Psychol 63:355-364

10. Margraf J (2009) Kosten und Nutzen der Psychotherapie: Eine kritische Literaturauswertung. In:Springer, Heidelberg

11. Nübling R, Bär T, Jeschke K et al. (2014) Versorgung psychisch kranker Erwachsener in Deutschland. Psychotherapeutenjournal 4:389-397

12. Olesen J, Gustavsson A, Svensson M et al. (2012) The economic cost of brain disorders in Europe. Eur J Neurol 19:155-162

13. Pesendorfer K (2017) Armut und soziale Eingliederung 2016: Ergebnisse aus EU-SILC 2016. <https://www.bmgf.gv.at/.../pg_2_5_armuts-_und_ausgrenzungsgefaehrdung.pptx>

14. Piso B, Reinsperger I (2014) Nachhaltigkeit der stationären psychiatrischen Rehabilitation für Erwachsene: systematischer Review (LBI-HTA Projektbericht Nr.: 75). In: Health Technology Assessment. Ludwig Boltzmann Institut Wien

15. Richter D, Eikelmann B, Reker T (2006) Arbeit, Einkommen, Partnerschaft: Die soziale Exklusion psychisch kranker Menschen. Gesundheitswesen 68:704-707

16. Riffer F, Schenk M (2015) Lücken und Barrieren im österreichischen Gesundheitssystem aus Sicht von Armutsbetroffenen, Die Armutskonferenz. . <http://www.armutskonferenz.at/files/armkon_barrieren_luecken_gesundheitssystem-2015_1.pdf>

17. Riffer F, Sprung M, Kaiser E (2017) Evaluationsergebnisse der Rehabilitationsklinik Gars am Kamp. Spectrum Psychiatrie 3:34-37

18. Schneider F, Dreer E (2013) Volkswirtschaftliche Analyse eines rechtzeitigen Erkennens von Burnout. Johannes Kepler Universität Linz <http://download.opwz.com/wai/Studie_UNI_Linz_Burnout_Volkswirtschaft_041213.pdf>

19. Statistik-Austria (2017) Arbeitsmarkt. <http://www.statistik.at/web_de/statistiken/menschen_und_gesellschaft/arbeitsmarkt/index.html>

20. Statistik-Austria (2017) Soziales. <http://www.statistik.at/web_de/statistiken/menschen_und_gesellschaft/soziales/index.html>

21. Steffanowski A, Löschmann C, Schmidt J et al. (2007) Meta-Analyse der Effekte stationärer psychosomatischer Rehabilitation: Mesta-Studie. Huber Bern

22. Wancata J, Sobocki P, Katschnig H (2007) Die Kosten von" Gehirnerkrankungen" in Österreich im Jahr 2004. Wiener klinische Wochenschrift 119:91-98

23. Whiteford HA, Degenhardt L, Rehm J et al. (2013) Global burden of disease attributable to mental and substance use disorders: findings from the Global Burden of Disease Study 2010. The Lancet 382:1575-1586

24. Wittchen HU, Jacobi F, Rehm J et al. The size and burden of mental disorders and other disorders of the brain in Europe 2010. European Neuropsychopharmacology 21:655-679

25. Wittmann W, Lutz W, Steffanowski A et al. (2011) Qualitätsmonitoring in der ambulanten Psychotherapie: Modellprojekt der Techniker Krankenkasse–Abschlussbericht. Hamburg: Techniker Krankenkasse <https://www.tk.de/centaurus/servlet/contentblob/342002/Datei/60650/TK-Abschlussbericht2011-Qualitaetsmonitoring-in-der-Psychotherapie.pdf>

26. Wittmann W, Steffanowski A (2011) Qualitätsmonitoring in der ambulanten Psychotherapie: Ergebnisse des TK-Modellprojekts. Psychotherapie Aktuell 3:6-12
